# Supplementary material
Source: publisher figshare collection journal article supplement (https://tandf.figshare.com/articles/dataset/_/7171742)
Supplement: Supplementary file 2 [file 1]

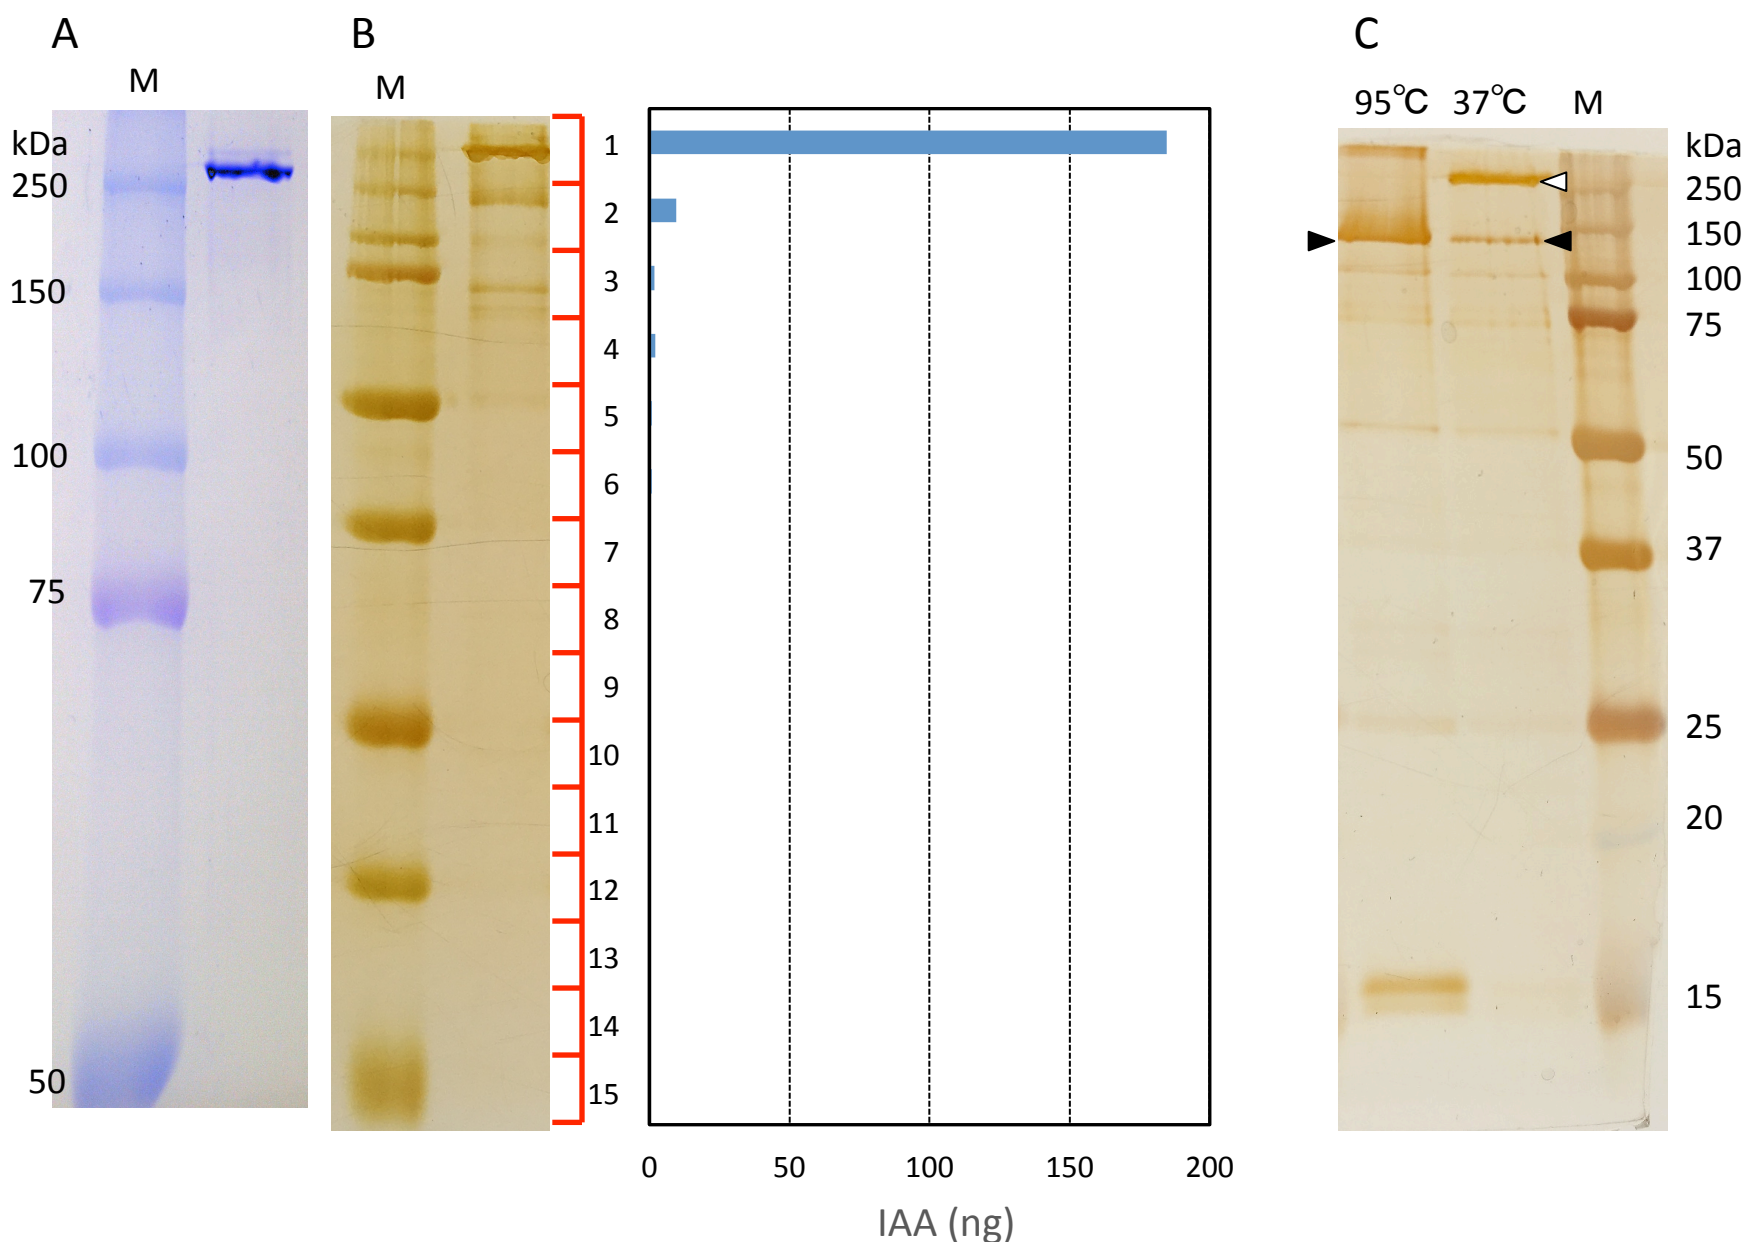

Supplemental Fig. 2. SDS-PAGE of BmIAO1 obtained after three rounds of chromatography. (A) The final active fraction was separated on SDS-PAGE and stained with CBB, detecting a single major band with a molecular weight of 260 kDa. (B) The active fraction was separated in two lanes by SDS-PAGE. The gel was silver stained and cut into 5 mm-wide segments (indicated with the red scale). The extract from each segment was assayed for enzyme activity. The sample was treated at 37 °C for 1 h before loading in A and B. (C) The active fraction was treated either at 37 °C for 1 h or at 95 °C for 5 min, and separated with SDS-PAGE. A 260-kDa band that was detected from the sample treated at 37 °C is indicated with an open arrowhead, and a 130-kDa band that appeared after the heat treatment at 95 °C is indicated with a solid arrowhead.
