# Supplementary material
Source: publisher figshare collection journal article supplement (https://tandf.figshare.com/articles/dataset/_/7171742)
Supplement: Supplementary file 3 [file 1]

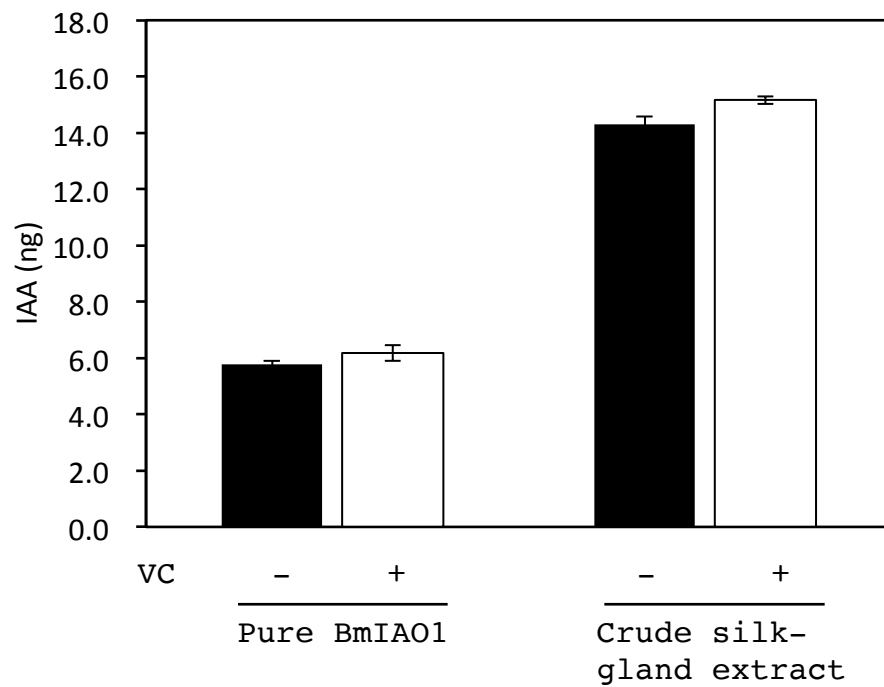

Supplemental Fig. 7. Effect of ascorbic acid (VC) on the activities of BmIAO1 and the crude silk-gland extract in converting IAOx to IAA.
