# Supplementary material
Source: publisher figshare collection journal article supplement (https://tandf.figshare.com/articles/dataset/_/7171742)
Supplement: Supplementary file 5 [file 1]

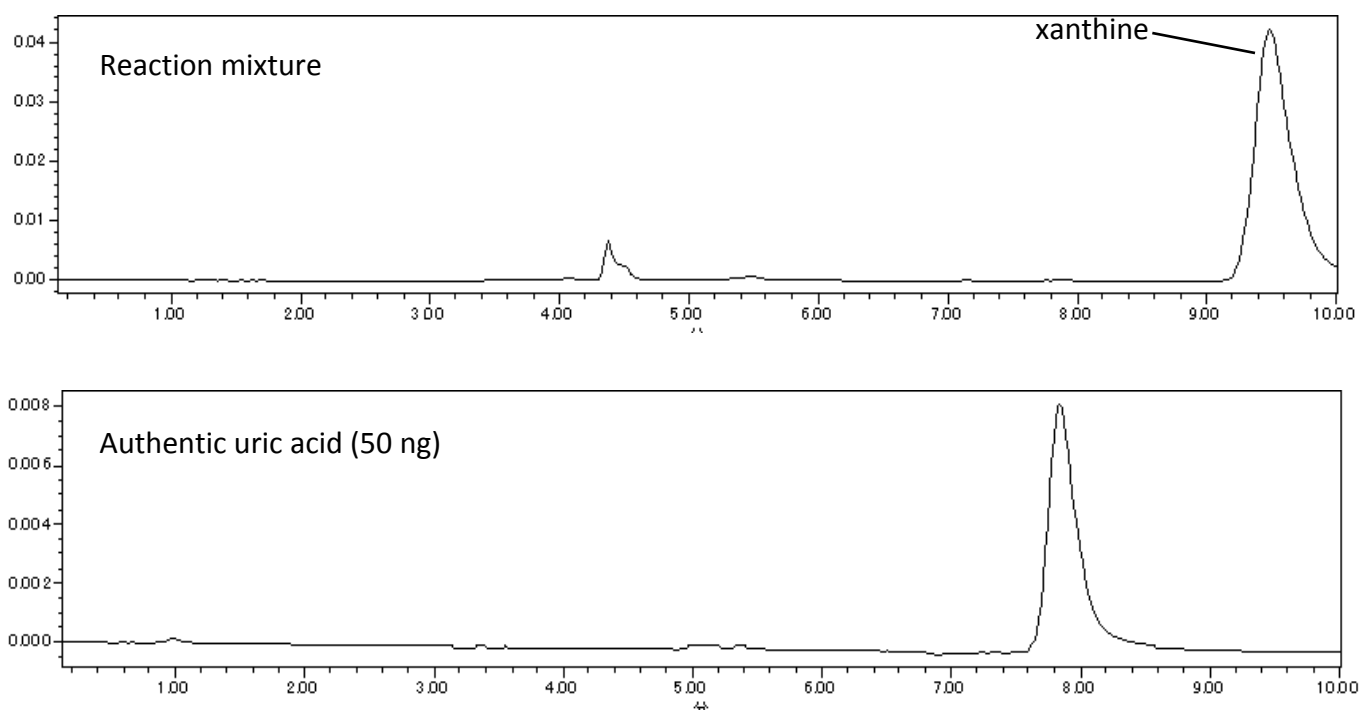

Supplemental Fig. 6. HPLC chromatograms. After incubation of 3.0 mg of xanthine with BmIAO1, uric acid in the reaction mixture was monitored on HPLC at 284 nm. (A) reaction mixture, (B) authentic uric acid (50 ng).
