# Supplementary material
Source: publisher figshare collection journal article supplement (https://tandf.figshare.com/articles/dataset/_/7171742)
Supplement: Supplementary file 6 [file 1]

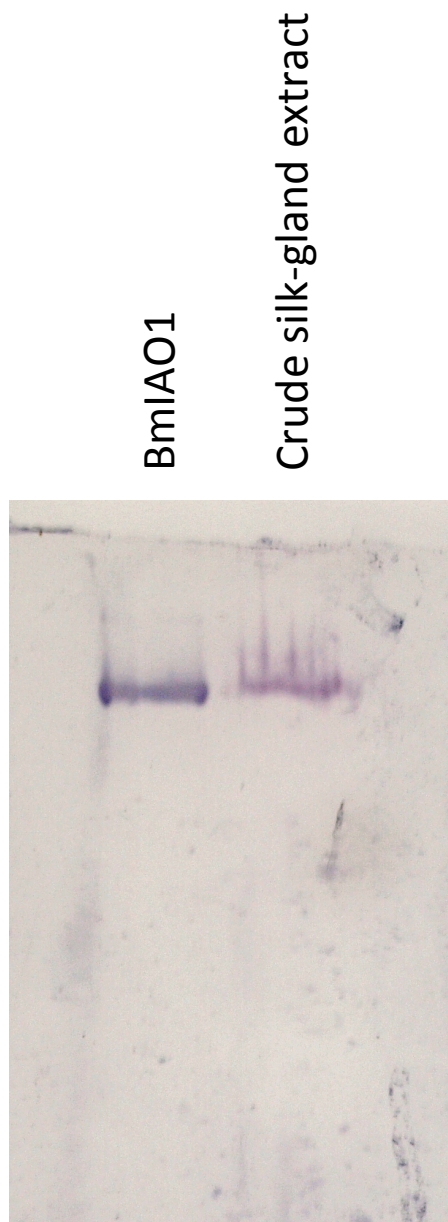

Supplemental Fig. 4. Activity staining of BmIAO1 and crude silk-gland extract. After native PAGE, color development was performed with IAAld as the substrate.
