# Supplementary material
Source: publisher figshare collection journal article supplement (https://tandf.figshare.com/articles/dataset/_/7171742)
Supplement: Supplementary file 7 [file 1]

|                |   |                                                              |
|----------------|---|--------------------------------------------------------------|
| Silkworm_XDH_1 | 1 | -----MGLLNAEEDPNKICTELVFYVNGKKVIE-SSPDPEWTLLWYLRKKLRITGTKLG  |
| Fruit_fly_XDH  | 1 | -----MSNSVLFFVNGKKVTE-VSPDPECTLLTFLREKLRLCGTKLG              |
| Silkworm_XDH_2 | 1 | -----MDAINEVVPRAETAALVFFVNGKKVLE-SNPDPETLLFYLRKKLRITGTYKG    |
| Human_XDH      | 1 | -----MTADKLVFVNGRKVVE-KNADPETTLLAYLRKKLGLSGTKLG              |
| Rat_XDH        | 1 | -----MTADELVFFVNGKKVVE-KNADPETTLLVYLRKKLGLCGTKLG             |
| Cow_XDH        | 1 | -----MTADELVFFVNGKKVVE-KNADPETTLLAYLRKKLGLRGTKLG             |
| Chicken_XDH    | 1 | -----MAPPETGDELVFVNGKKVVE-KDVPETTLLTYLRKKLGLCGTKLG           |
| Maize_XDH      | 1 | MGSLTRVPAEDPAAAEWEWSDEAVIYVNGVRRVL-PDGLAHLTLLQYLR-DIGLRGTLKG |
| Maize_AO-1     | 1 | -----MGKEAGAAESSTVVLAVNGKRYEA-AGVAPSTSLLEFLRTQTPTVRGPKLG     |
| BmIAO1         | 1 | -----MSNIEFTVNGILCSVGCEVSSTLMVDYIRHHLRLRGTKYM                |

|                |    |                                                               |
|----------------|----|---------------------------------------------------------------|
| Silkworm_XDH_1 | 54 | CAEGGCGACTVMVSKYNRQENKIIHLAVNACLAPVCAMHGLAVTTVEGIGSTKTKLHPVQ  |
| Fruit_fly_XDH  | 43 | CAEGGCGACTVMVSRLDRRANKIRHLAVNACLTPVCSMHGCAVTTVEGIGSTKTRLHPVQ  |
| Silkworm_XDH_2 | 53 | CGEGGCGACTVMVSKYLNEDRINHIAVNACLISVCAMHGLAVTTVEGIGSTQDRLHPVQ   |
| Human_XDH      | 43 | CGEGGCGACTVMLSKYDRLQNKIVHFSANACLAPICSLHHVAVTTVEGIGSTKTRLHPVQ  |
| Rat_XDH        | 43 | CGEGGCGACTVMISKYDRLQNKIVHFSVNACLAPICSLHHVAVTTVEGIG-NTQKLHPVQ  |
| Cow_XDH        | 43 | CGEGGCGACTVMLSKYDRLQDKIIHFSANACLAPICTLHHVAVTTVEGIGSTKTRLHPVQ  |
| Chicken_XDH    | 47 | CGEGGCGACTVMISKYDPFQKILHHTANACLFPICALHHVAVTTVEGIGNTKSRLHPAQ   |
| Maize_XDH      | 59 | CGEGGCGACTVMVSCYDRITKKS LHFATINACLAPLYSVEGMHIITVEGIGDRQRLHPVQ |
| Maize_AO-1     | 50 | CGEGGCGACVVLVSKYDPATDEVTEFSASSCLTLLHSVDRCSVTTSEGIGNTRDGYHPVQ  |
| BmIAO1         | 42 | CREAGCGACNVSVIKTPGGP----ELSVNSCVVPVASC DGWKIKTIESIGNKKGYSHSIQ |

|                |     |                                                               |
|----------------|-----|---------------------------------------------------------------|
| Silkworm_XDH_1 | 114 | ERIAKAHGSQCGFCTPGIVMSMYTLLRSCKNI-----QYSDLEVAFQGNLCR          |
| Fruit_fly_XDH  | 103 | ERLAKAHGSQCGFCTPGIVMSMYALLRNAEQP-----SMRDLLEVAFQGNLCR         |
| Silkworm_XDH_2 | 113 | ERIAKSHGSQCGFCTPGIVMSMYALLRNNIKI-----AYEDIEGALQGNLCR          |
| Human_XDH      | 103 | ERIAKSHGSQCGFCTPGIVMSMYTLLRNQPEP-----TMEEIEENAFQGNLCR         |
| Rat_XDH        | 102 | ERIAKSHGSQCGFCTPGIVMSMYTLLRNQPEP-----TVEEIEENAFQGNLCR         |
| Cow_XDH        | 103 | ERIAKSHGSQCGFCTPGIVMSMYTLLRNQPEP-----TVEEIEDAFQGNLCR          |
| Chicken_XDH    | 107 | ERIAKSHGSQCGFCTPGIVMSMYTLLRNKPKP-----KMEDIEDAFQGNLCR          |
| Maize_XDH      | 119 | ECLAKAHGSQCGFCTPGFVMSMYALLRSSKQPP-----TEDQIEDCLAGNLCR         |
| Maize_AO-1     | 110 | QRLSGFHASQCGFCTPGMCMISFISALVKADNKSDRPDPAGFSKITTS EAEKAVSGNLCR |
| BmIAO1         | 98  | KAVAKCNGTQCGYCTPGVWMAMYSLQLNNTEMT-----MLEIEKSFEGNLCR          |

|                |     |                                                            |
|----------------|-----|------------------------------------------------------------|
| Silkworm_XDH_1 | 161 | CTGYRAIIEGYKTFIEDWEAQRIKNGP-----QNGTCAMGKDCCKNKSDSCE       |
| Fruit_fly_XDH  | 150 | CTGYRPILEGYKTFTEKFCAG-----MGEKCKVSGKGCG                    |
| Silkworm_XDH_2 | 160 | CTGYRPIIEGKTFMEGWENVYSTG-----GNMCRMGENCCRI                 |
| Human_XDH      | 150 | CTGYRPILQGFRTFARD-----GGCCGGDGNPNCCMNQKKD                  |
| Rat_XDH        | 149 | CTGYRPILQGFRTFAKD-----GGCCGSGGNPNCCMNQTKD                  |
| Cow_XDH        | 150 | CTGYRPILQGFRTFAKN-----GGCCGNGNPNCCMNQKKD                   |
| Chicken_XDH    | 154 | CTGYRPILEGYRTFAVDSNCCGKAANGTGCCHSKGENSMNGGCCGKANPGCCMNE-KE |
| Maize_XDH      | 167 | CTGYRPIIDAFRVFAKTDNLAYTNSCEDAKDQAICPSTGKPCSCRNETDVNVNESSLS |
| Maize_AO-1     | 170 | CTGYRPIDVTCKSFASD-----VDLEDLGLNCFW                         |
| BmIAO1         | 145 | CTGYRTILQAFKQYAKD-----SPT                                  |

|                |     |                                                                |
|----------------|-----|----------------------------------------------------------------|
| Silkworm_XDH_1 | 209 | EADSESQYIFDKSSFLPYDSSQEPIFPPELKLSSIYDSQYVIYRGKQTTWYRPTNIETVL   |
| Fruit_fly_XDH  | 185 | TDAETDDKLFERSEFQPLDPSQEPIFPPELQLSDAFDSQS LIFSSDRVTWYRPTNLEELL  |
| Silkworm_XDH_2 | 198 | KKETEHDLIFDPSAFRPYDPTQEPIFPPELKLNEYSTSYLVFRGENVIWLRPNRLKELV    |
| Human_XDH      | 187 | HSVSLSPSLFKPEEFTPLDPTQEPIFPPELRLKDTPRKQLRFEGERVWIIQASTLKELL    |
| Rat_XDH        | 186 | QTVSLSPSLFNPEDFKPLDPTQEPIFPPELRLKDTPPKKLRFEGERVWIIQASTMEELL    |
| Cow_XDH        | 187 | HTVTLSPSLFNPEEFMPLDPTQEPIFPPELRLKDVPPKQLRFEGERVWIIQASTLKELL    |
| Chicken_XDH    | 213 | NVTMMSSSLFDSSSEFQPLDPTQEPIFPPELMTQRNKEQKQVCFKGERVMWIIQPTTLQELV |
| Maize_XDH      | 227 | SVERYSPYSYNEIDGSAYNE-RELIFPPELQLRKVMP--LKLNKSNEIKWYRPLKQLL     |
| Maize_AO-1     | 199 | KKGEPAEVSRLPGYNSGAVCTFPEFLKSEIKSTMKQVNDVPIAASGDGWYHPKSTIELH    |
| BmIAO1         | 165 | SISDIEDLHICEKSDQCCCKNCDESDWCLVANNVGSTTKELTLKDGVKWFTVTQISDIF    |

|                |     |                                                                |
|----------------|-----|----------------------------------------------------------------|
| Silkworm_XDH_1 | 269 | SLKDK--FPNAKVVVGNSEVGVVEVKFKRCVYPIIIMPNCVPELNNTITENEHGLTVGASVT |
| Fruit_fly_XDH  | 245 | QLKAK--HPAAKLVGNTVEGVVEVKFKHFLYPHLINPTQVKELLEIKENQDGIYFGAASV   |
| Silkworm_XDH_2 | 258 | LVKSR--IPDSKVVVGNTIEIGVEMKFKKFFYPVLISPTIIGEVNYCSIENDGILVGAAT   |
| Human_XDH      | 247 | DLKAQ--HPDAKLVGNTIEIGIEMKFKNMLFPMIVCPAWIPELNSVEHGPDGISFGAACP   |
| Rat_XDH        | 246 | DLKAQ--HPDAKLVGNTIEIGIEMKFKNMLFPLIVCPAWIPELNSVHGPPEGISFGASCP   |
| Cow_XDH        | 247 | DLKAQ--HPEAKLVGNTIEIGIEMKFKNQLFPMIICPAWIPELNAVEHGPPEGISFGAACA  |
| Chicken_XDH    | 273 | ALKSQ--YPNAKLVGNTVEGVIEMLKNNMLYPVILAPAWIPEMNAVQQTETGITFGAACT   |
| Maize_XDH      | 284 | HLKSC--YLDAKLIIGNSEGVVETKFKNAQYKVLIAVTHIPELNTLKAKEDGHIHGSAVR   |
| Maize_AO-1     | 259 | RLFDSSWFDDSSVKIVASNTGSGVYKQDLYDKYIDIKGIPELSVINKNDKAIELGGSVVS   |

|                |     |                                                                  |
|----------------|-----|------------------------------------------------------------------|
| BmIAO1         | 225 | EILLVEGTDSYMLAAGN--TSKVPYPITTPFSVIIDISGVSELKGYTLTDQN-LVVGAGNT    |
| Silkworm_XDH_1 | 327 | LNDIEETFREYIKKLPPYKTRVLTTIVEMLNWFAGKQIRNVAAIGGNVMTGS----PISD     |
| Fruit_fly_XDH  | 303 | LMEIDALLRQRIEQLPESETRFLFQCTVDMLEHYFAGKQIRNVACLGGNIMTGS----PISD   |
| Silkworm_XDH_2 | 316 | LTELQIFLKSFIVEHP-SKSKI FKAVNAMLHWFAGKQVRNVASLTGNIVTAS----PISD    |
| Human_XDH      | 305 | LSIVEKTLVDAVAKLPAQKTEVFRGVLEQLRWFAGKQVKSVASVGGNIITAS----PISD     |
| Rat_XDH        | 304 | LSLVESVLAEEIAKLPEQKTEVFRGVMEQLRWFAGKQVKSVASIGGNIITAS----PISD     |
| Cow_XDH        | 305 | LSSVEKTLLEAVAKLPTQKTEVFRGVLEQLRWFAGKQVKSVASLGGNIITAS----PISD     |
| Chicken_XDH    | 331 | LSSVEEVLKAVAEALPSYKTEIFQAALQLRWFAGPQIRNVAAALGGNIMTAS----PISD     |
| Maize_XDH      | 342 | LAQLQNFLKKVVAEHDLPETSSCQAIVRQLKWFAGTQIRNVASIGGNICTAS----PISD     |
| Maize_AO-1     | 319 | ISKAIEVLSD-----GNLVFRKIDHLLNKVASPFVRNTATIGGNIMMAQR-LPFESD        |
| BmIAO1         | 282 | LTEFMEILEKASTEEG---FEYLVKFTHEMEYLGHKTLRNATIGGNLMMKNKNVAFASD      |
| Silkworm_XDH_1 | 383 | LNPILMSLKVKLNLLSQEN---GHRTVLMDETFFTGYRKNVVKSN EILLSIEIPFSTKFQ    |
| Fruit_fly_XDH  | 359 | MNPVLSAAGQLEVASFVDGKLQKRSVHMGTFFFTGYRRNVIEAHEVLLGIHFRKTPDQ       |
| Silkworm_XDH_2 | 371 | LNPILMPCSAVLNVYSTTN---GSRQITIDENFFKGYRKTILEDDEVVISIKLPFSTNDQ     |
| Human_XDH      | 361 | LNPVFMASGAKLTLVSRGT----RRTVQMDHTFFPGYRKTLLSP EILLSIEIPYSREGE     |
| Rat_XDH        | 360 | LNPVFMASGAKLTLVSRGT----RRTVRMDHTFFPGYRKTLLRPEEILLSIEIPYSKEGE     |
| Cow_XDH        | 361 | LNPVFMASGAKLTLVSRGT----RRTVPMDHTFFPSYRKTLLGP EILLSIEIPYSREDE     |
| Chicken_XDH    | 387 | LNPVLMASGSKLTLISMEG----KRTVMMEDEKFFTGYRKTIVKPEEVLLSVEIPYSKEGE    |
| Maize_XDH      | 398 | LNPLWIAVGAKFH IIDVNG---NVRTTLAKDFFLGYRKVDIKPEEILLSIILPWTRPFE     |
| Maize_AO-1     | 370 | VATVLLAAGSTVTVQVASKR-----LCFTLEEFLEQPPCDSRTLLLSIFPEWGS DY        |
| BmIAO1         | 339 | LYLLFEIVGAQVTVKSEQEYG-----TETVTMHEFTLLKMGVKVLVNILPLPLEDY         |
| Silkworm_XDH_1 | 440 | YLKAIKQAKRREDDISIVTSAVNVEFEE--NTNVIKYINLAFGG-MAPVTKIATNTGNVL     |
| Fruit_fly_XDH  | 419 | YIVAFKQARRRDDIIAIVNAAINVR FEE--KSNIVAEISMAFGG-MAPTTLAPRTSQLM     |
| Silkworm_XDH_2 | 428 | YFKSYKQARRRDDDISIVTAAFNVQFE----GNKVIKSKLCYGG-MGPTTLLASKSSKML     |
| Human_XDH      | 417 | YFSAFKQASRREDDIAKVTSGMRVLFKP--GTTEVQELALCYGG-MANRTISALKTTQ RQ    |
| Rat_XDH        | 416 | FFSAFKQASRREDDIAKVTSGMRVLFKP--GTIEVQELSLCFGG-MADRTISALKTT PKQ    |
| Cow_XDH        | 417 | FFSAFKQASRREDDIAKVTSGMRVLFQP--GSMQVKELALCYGG-MADRTISALKTTQ KQ    |
| Chicken_XDH    | 443 | YFSAFKQAYRREDDIAIVTCGMRVLFQH--GTSRVQEVKLSYGG-MAPTTLALKTCREL      |
| Maize_XDH      | 454 | YVKEFKQAHRRDDIALVNAGMRVYLQETERNWIISDVSI VFGG-VAAVPLSASRTENFL     |
| Maize_AO-1     | 422 | VTFETFRAAPRPFGNVSYVNSAFLARTS-GSLIEDICLAFGAYGVDHAIRAKKVEDFL       |
| BmIAO1         | 390 | KIVTFKIMQRAQAVHATLNAGFN YKLSN---DNVVREAKIVYGALT TASTRATETEKYLI   |
| Silkworm_XDH_1 | 497 | KGLKWNENMLEKAYSLLIDELPLDPSAPGGNIQFRRAL TMSLFLKSYLAIGKAMS-SD--    |
| Fruit_fly_XDH  | 476 | VGQEWSHQLVERVAESLCTELPLAASAPGGMIAYRRALV VSLFFKAYLAISLKL SKSG--   |
| Silkworm_XDH_2 | 483 | LGKHWNHETLSTVFHSLCEEFNLEFSVPGGMAEYRKSLCLSLFFKFYLVNKDKLDISN--     |
| Human_XDH      | 474 | LSKLWKEELLQDVCAGLAEELHLPDAPGGMVDFRCTL TLSFFFFKFYLTVLQKL GQE---   |
| Rat_XDH        | 473 | LSKSWNEELLQSV CAGLAEELQLAPDAPGGMVEFRRTL TLSFFFFKFYLTVLQKL GRA--- |
| Cow_XDH        | 474 | LSKFWNEKLLQDVCAGLAEELSLSPDAPGGMIEFRRTL TLSFFFFKFYLTVLKKL GK----  |
| Chicken_XDH    | 500 | AGRDWNEKLLQDACRLLAGEMDLSPSAPGGMVEFRRTL TLSFFFFKFYLTVLQKL SKDQ--  |
| Maize_XDH      | 513 | TGKKWDSGLLDDTFNLLKEDISISENAPGGMIEFRRL TLSFFFFKFYLSVTHEMKIKG--    |
| Maize_AO-1     | 481 | KGKSLSSFVILEAIKLLKDTVSPSEGT--HHEYRVSLAVSFLFSLSSLANSSSAPSNI       |
| BmIAO1         | 447 | GKPLFTNETLQGALTVLDSDLVVENPPEPSAEYRKHLALCLFYKGLLSLCPTATLQP--      |
| Silkworm_XDH_1 | 554 | -YVYGDLI---ESY YGSGADSFHGNVPKSSQYFELVGEKQLKSDAVGRPIQHMSAYKQAT    |
| Fruit_fly_XDH  | 534 | -ITSSDAL---PSEERSGAETFHTPVLKSAQLFERVCSDQ PICDP IGRPKVHAAALKQAT   |
| Silkworm_XDH_2 | 541 | -GESSTRP---PKLSCG---DETRGEPSSSQYFEIRNSGE--VDALGKPLPHASAMKHAT     |
| Human_XDH      | 531 | --NLEDCG-KLDPTFASATLLFQKDPADVQLFQEV PKGQSEEDMVGRPLPHLAADMQAS     |
| Rat_XDH        | 530 | --DLED MCGKLDPTFASATLLFQKDPANVQLFQEV PKDQSEEDMVGRPLPHLAANMQAS    |
| Cow_XDH        | 530 | --DSKDKCGKLDPTYTSATLLFQKHPPANIQLFQEV PNGQSKEDTVGRPLPHLAAAMQAS    |
| Chicken_XDH    | 558 | -NGPNNLCEPVPPNYISATELFHKDPIASTQLFQEV PRGQLVEDTVGRPLVHLSAAKQAC    |
| Maize_XDH      | 571 | -LLADGLHADHLSAVQPYSRPVTVGTQSYELVRQG-----ASVQGPMVHMSAMLQVT        |
| Maize_AO-1     | 539 | DTPNGSYTHETGSNVDSPERHIKVDSNDLPIRSRQEMVFSDEYKPVGKPIKKVGAEIQAS     |
| BmIAO1         | 505 | -----RYSRGAIKIHDSRPVSEATQTYETNNKLYPLTEPLPKHEALIQCS               |
| Silkworm_XDH_1 | 610 | GEAIYCDDMPIAEGELYLAFVLSSKAHAKLISVDAKKALAE PGVIAFYSAKDLT----KE    |
| Fruit_fly_XDH  | 590 | GEAIYTDDIPRMDGEVYLAFVLSTKPRAKITKLDASEALALDGVHQFFCYKDLT----EH     |
| Silkworm_XDH_2 | 592 | GEAIYCDDLPRIDGELFTLVLSSESHAKIKSIDTTAALSIPGVVAF FCAKDL E----VD    |
| Human_XDH      | 588 | GEAVYCDDIPRYENELSLRLVTSTRAHAKIKSIDTSEAKKVP GFVCFISADDVP----GS    |
| Rat_XDH        | 588 | GEAVYCDDIPRYENELSLRLVTSTRAHAKITSIDTSEAKKVP GFVCFLTAEDVP----NS    |
| Cow_XDH        | 588 | GEAVYCDDIPRYENELFLRLVTSTRAHAKIKSIDVSEA QKVP GFVCFLSADDIP----GS   |
| Chicken_XDH    | 617 | GEAVYCDDIPHYENELYLTLVSTQAHAKILSIDASEAQSVPGFVCFVSAKDV P----GS     |

|                |     |                                                                                                                 |
|----------------|-----|-----------------------------------------------------------------------------------------------------------------|
| Maize_XDH      | 622 | GEAEYTD <del>DD</del> TPPPNTLHAAVL <del>SK</del> KAHARILSIDDSLAKSSPGFAGLFLSKDIP----GV                           |
| Maize_AO-1     | 599 | GEAVYVDDIPAPKDCLYGAFI <del>Y</del> STH <del>PH</del> AHVRSINFKSSLASQKVITVI <del>TAKD</del> IPSG--GE             |
| BmIAO1         | 550 | GEAMYSDDLPLSPHEV <del>FA</del> SVFVLSTVAVGEIISIDPTKALEVDGVI <del>AF</del> YSAKDIPGLNSFT                         |
|                |     |                                                                                                                 |
| Silkworm_XDH_1 | 666 | QNSIGPIF <del>HDEEL</del> FARDKVLSQGQTIGVIVAVDQATAQAARMVKVEY--EEIQPIIVTI                                        |
| Fruit_fly_XDH  | 646 | ENEVGVPV <del>FHDEH</del> VFAAGEVHCYGGIVGAIADNKALAQRAARLVKVEY--EELSPVIVTI                                       |
| Silkworm_XDH_2 | 648 | RNIWGSIIKDEE <del>IFC</del> STYVTSRSCIVGAI <del>VATSEI</del> VAKKARDLV <del>SITY</del> --ERLQPVIVTL             |
| Human_XDH      | 644 | NITG--ICNDETVFAKDKVTCVGHIIIGAVVADTPEHTQRAAQGVKITY--EELP-AIITI                                                   |
| Rat_XDH        | 644 | NATG--LFNDETVFAKDEVTCVGHIIIGAVVADTPEHAQRAARGVKITY--EDLP-AIITI                                                   |
| Cow_XDH        | 644 | NETG--LFNDETVFAKDTVTCVGHIIIGAVVADTPEHAERAAHVVKVITY--EDLP-AIITI                                                  |
| Chicken_XDH    | 673 | NITG--IANDETVFAEDVVTVCVGHIIIGAVIADTQEHSRRAAKAVKIKY--EELK-PIVTI                                                  |
| Maize_XDH      | 678 | NHTG-PIIHDEEFFASNI <del>VTCV</del> GQIIIGIVVADTHDNAKTAANKVHIEY--CELP-AILSI                                      |
| Maize_AO-1     | 657 | NIGSSFLMQGEALFADPIAEFAGQNIGV <del>VIAET</del> QRYANMAAKQAVVEYSTENLQPPILTI                                       |
| BmIAO1         | 610 | PDDLPLYAQAEVVLCSGRVCY <del>YE</del> QPIGIIVAEDQITADIAAKLVKATY--KNFKNFVVNI                                       |
|                |     |                                                                                                                 |
| Silkworm_XDH_1 | 724 | EDAIKYN <del>SF</del> YPQ--FPKTIKRGNVKAVFDDKNN-IIIEGRCRMGGQEHFYLETHAAFAIP                                       |
| Fruit_fly_XDH  | 704 | EQAI <del>EHKS</del> YFPD--YPRFVTKGNVEEALAQAD--HTFEGTCRMGGQEHFYLETHAALAVP                                       |
| Silkworm_XDH_2 | 706 | EDAI <del>EHNS</del> YFEN--YPQTL <del>SQGN</del> VDEVFSKTK--FTVEGKQRSQAQEHFYLETISAYAIR                          |
| Human_XDH      | 699 | EDAIK <del>NNS</del> YFGP--ELKIE-KGDLKKG <del>FSEAD</del> --NVVSGEIIYGGQEHFYLETHCTI <del>AVP</del>              |
| Rat_XDH        | 699 | QDAI <del>NNS</del> YFGS--EIKIE-KGDLKKG <del>FSEAD</del> --NVVSGELYIGGQEHFYLETNCTI <del>AVP</del>               |
| Cow_XDH        | 699 | EDAIK <del>NNS</del> YFGS--ELKIE-KGDLKKG <del>FSEAD</del> --NVVSGELYIGGQDHFYLETHCTI <del>AVP</del>              |
| Chicken_XDH    | 728 | EEAIEQQ <del>SFI</del> KP--IKRIE-KGDV <del>NKGF</del> ESD--HILEGEMHIGGQEHFYLETNCTI <del>AVP</del>               |
| Maize_XDH      | 734 | EEAVKIG <del>SF</del> HPN--TKKCLVKG <del>DVEQ</del> CFLSGACDRIVSGQVHVGGQEHFYMEPQCTI <del>LVP</del>              |
| Maize_AO-1     | 717 | EDAIQRNSYIQIP <del>PFLAP</del> KPVGDY <del>NK</del> MAEADH-KILSAE <del>VKLE</del> SQYYFYMETQAALAI <del>P</del>  |
| BmIAO1         | 668 | KEAIQDASRNTLY-----TSADATE <del>TGT</del> DVTKVISGTNSGDQYHFTMETLVCV <del>TNP</del>                               |
|                |     |                                                                                                                 |
| Silkworm_XDH_1 | 781 | KKEDDELQIF <del>CSS</del> QHPSEIAKL <del>VSHIL</del> HVPMNRIVARVKRMGGGFGGKESRGMLVALPVA                          |
| Fruit_fly_XDH  | 760 | R-DSDELELFCSTQHPSEVQKLVAHV <del>TALPA</del> HRVVCRAKRLGGGFGGKESRGISVALPVA                                       |
| Silkworm_XDH_2 | 762 | K--EDELEIIC <del>SSQ</del> SPSEIASFVSHTLGIPQH <del>KVIA</del> KVKRIGGGFGGKETRSSSLALPVA                          |
| Human_XDH      | 754 | KGEAGEMELFVSTQNTMKTQS <del>FVAK</del> MLGVPANRIVVRVKRMGGGFGGKETRSTV <del>VST</del> AVA                          |
| Rat_XDH        | 754 | KGEAGEMELFVSTQNTMKTQS <del>FVAK</del> MLGVPDNRIVVRVKRMGGGFGGKETRSTV <del>VST</del> ALA                          |
| Cow_XDH        | 754 | KGEEGEMELFVSTQ <del>NAM</del> KTQS <del>FVAK</del> MLGVPVNRILVRVKRMGGGFGGKETRSTLV <del>SV</del> AVA             |
| Chicken_XDH    | 783 | KGEDGEMELFVSTQNL <del>MKTQ</del> EFTASALGVPSNRIVVRVKRMGGGFGGKETRNTIL <del>TT</del> VVA                          |
| Maize_XDH      | 792 | VDSGNEIHMV <del>SSTQ</del> APQKHQKYVASVLGLPQS <del>KVVCK</del> TKRIGGGFGGKETRS <del>AI</del> FAAAAS             |
| Maize_AO-1     | 776 | D-EDNCIT <del>IYS</del> STQMPELTQNL <del>IAR</del> CLGIPFHNVRVISRRVGGGFGGKAMKATH <del>TACACA</del>              |
| BmIAO1         | 720 | T--EEGLEIHTATQWTNGVQLMVSRALGIEK <del>NRVD</del> VHVRRVGGAYGLKISRSTQVAVACS                                       |
|                |     |                                                                                                                 |
| Silkworm_XDH_1 | 841 | LAAHKLNRPVWCMLDRDEDMQ <del>MTG</del> TRHPFLIKYKAATKEGKIVGAVVNIYNNGGYSTD <del>L</del>                            |
| Fruit_fly_XDH  | 819 | LAAYRMGRPVRCMLDRDEDM <del>LITG</del> TRHPFLFKYKVGFTKEGLITACDIECYN <del>NAG</del> WSMDL                          |
| Silkworm_XDH_2 | 820 | IAAYILKKPVRSV <del>LD</del> RDEDIQMSGIRHPFLTKYKVAFDENGK <del>IAGAV</del> DFVANGGFSMDL                           |
| Human_XDH      | 814 | LAA <del>YKTGR</del> PVRCMLDRDEDM <del>LITG</del> GRHPFLARYKVGFMKTGT <del>VVALE</del> VDFHSN <del>GN</del> TQDL |
| Rat_XDH        | 814 | LAAHKTGRPVRCMLDRDEDM <del>LITG</del> GRHPFLAKYKVGFMKTGT <del>VVALE</del> VAHFSN <del>GN</del> TEDL              |
| Cow_XDH        | 814 | LAAYKTGHPVRCMLDRNEDML <del>ITG</del> GRHPFLARYKVGFMKTGT <del>IVALE</del> V <del>VDH</del> YSNAGNSRDL            |
| Chicken_XDH    | 843 | VAAFKTGRPVRCMLDRDEDM <del>LISG</del> GRHPFLGRYKVGFMKNGKIKSLEVS <del>YS</del> SNNGNSADL                          |
| Maize_XDH      | 852 | VPSFCLRRPVKLVLDRD <del>VDMIS</del> TGQRHSFLGKYKVGFTNEGKILALDLEIYNNGGHS <del>LDL</del>                           |
| Maize_AO-1     | 835 | LAAFKLRRPVRMYLDRKTD <del>MIMAG</del> GRHPMKAKYSVGFKSDGKITALHL <del>DLGIN</del> AGISPDV                          |
| BmIAO1         | 778 | LVTYKLNRP <del>CRIL</del> QSLATNMKAMGKRLPYLAKYEVAVN <del>SSGT</del> VQYTNLNM <del>YED</del> NG--YKI             |
|                |     |                                                                                                                 |
| Silkworm_XDH_1 | 901 | SGPVVERAMFHFENAYYIPNCEVTGYVCR <del>TNLP</del> SNTAFRGFGGPQGMFAGNMVREIAHR                                        |
| Fruit_fly_XDH  | 879 | SFSVLERAMFHFENCYRIPNVRVGGWVCKTNLPSNTAFRGFGGPQGM <del>YAGE</del> HIIRDVARI                                       |
| Silkworm_XDH_2 | 880 | SCALIERSTFHV <del>DN</del> CYSIPNIKINAYVCKTNLPSNTAFRGFGAPQV <del>MLAE</del> SMIRQIAST                           |
| Human_XDH      | 874 | SQSIMERALFHMDNCYKIPNIRGTGR <del>LCK</del> TNLPSNTAFRGFGGPQGM <del>LIAE</del> CWMSEVAVT                          |
| Rat_XDH        | 874 | SRSIMERALFHMDNAYKIPNIRGTGR <del>ICK</del> TNLPSNTAFRGFGGPQGM <del>LIAE</del> YWMSEVAIT                          |
| Cow_XDH        | 874 | SHSIMERALFHMDNCYKIPNIRGTGR <del>LCK</del> TNLSSNTAFRGFGGPQALFIAENWMSEVAVT                                       |
| Chicken_XDH    | 903 | SHGVMDRALLHLDNSYNIPNVSIMGFICKTNLSSNTAFRGFGGPQGM <del>LIAE</del> CWMSDLARK                                       |
| Maize_XDH      | 912 | SLAVLERAMFHSENVYDIENIRINGQVCF <del>TN</del> FPSNTAFRGFGGPQGLL <del>LIAE</del> NW <del>IHH</del> IATE            |
| Maize_AO-1     | 895 | SP-LMPRAIIGALKKY <del>NWGT</del> LEFDTKVCKTNVSSKSAMRAPGDVQGSFIAEAI <del>IEH</del> VASA                          |
| BmIAO1         | 836 | NEDFYGLSLDAINN <del>CYK</del> SKNLTYKCYNTVTDTHKNTWCRA <del>PGTME</del> FIANTELIMERI <del>AYE</del>              |
|                |     |                                                                                                                 |
| Silkworm_XDH_1 | 961 | LGKSP <del>EEIS</del> RNLNLYRGNNTTHYG----QVLT <del>YCT</del> LQRCWDECVQNSNLAERK <del>LK</del> IKEFNK            |
| Fruit_fly_XDH  | 939 | VGRDVVDV <del>MRLN</del> FYKTDGYTHYH----QQLEHFP <del>IERC</del> LEDCLKQSR <del>YDE</del> KRQEIARFNR             |
| Silkworm_XDH_2 | 940 | LGKSYEEIVEVNIYKEGSV <del>TY</del> YN----QLLT <del>YCT</del> LSRCWNQCIDSSRYIARKKAV <del>ND</del> FNR             |
| Human_XDH      | 934 | CGMPAEEVRRKNLYKEGDLTHFN----QKLEGFTLPRCWEECLASSQYHARKSE <del>V</del> DKFNK                                       |
| Rat_XDH        | 934 | CGLPAEEVRRKNMYKEGDLTHFN----QKLEGFTLPRCWDECIASSQYLARKRE <del>VE</del> KFNR                                       |

|                |      |                                                                 |
|----------------|------|-----------------------------------------------------------------|
| Cow_XDH        | 934  | CGLPAEEVRWKNMYKEGDLTHFN----QRLEGFSVPRCWDECLKSSQYYARKSEVDFKFNK   |
| Chicken_XDH    | 963  | CGLPPEEVRKINLYHEGDLTHFN----QKLEGFTLRRCWDECLSSSNYHARKKLIEEFNK    |
| Maize_XDH      | 972  | LQRSPPEEIKELNFHNDGVVLYHG----QLQNCTISSVWDELKASCNFVEARKAINNFNS    |
| Maize_AO-1     | 954  | LALDTNTVRRKNLHDFESLEV FYGESAGEASTYSLVSMFDKLALSPEYQHRAMIEQFNS    |
| BmIAO1         | 896  | LELDPVTVRLANVDTKR-----YKEVIEAYETLTKTADYEARRAEVNTFNA             |
|                |      |                                                                 |
| Silkworm_XDH_1 | 1017 | QHRWRKRGISIIPTKFGIAFTEKLLNQAGALVLVYVDGSVLLSHGGTEMGQGLHTKMIQV    |
| Fruit_fly_XDH  | 995  | ENRWRKRGMAMVPTKYGIAFGVMHLNQAGSLINLYGDGSVLLSHGGVEIGQGLNTHKMIQC   |
| Silkworm_XDH_2 | 996  | SNRWKKKGIALVPTKYGISFQTDVLMQAGALLVYNDGAVLLSIGGIEMGQGLFTKMIQI     |
| Human_XDH      | 990  | ENCWKKRGLCIIPTKFGISFTVPFLNQAGALLHVYTDGSVLLTHGGTEMGQGLHTKMOVQV   |
| Rat_XDH        | 990  | ENCWKKRGLCIIPTKFGISFTLPFLNQAGALVHVYTDGSVLLTHGGTEMGQGLHTKMOVQV   |
| Cow_XDH        | 990  | ENCWKKRGLCIIPTKFGISFTVPFLNQAGALHVYTDGSVLLSHGGTEMGQGLHTKMOVQV    |
| Chicken_XDH    | 1019 | QNRWKKRGMCIPTKFGISFTVPFLNQAGALVHVYTDGSVLLTHGGTEMGQGLHTKMIQV     |
| Maize_XDH      | 1028 | NNRWKKRGIAMIPTKFGISFTAKFMNQAGALVQVYTDGTVLVTHGGVEMGQGLHTKVAQV    |
| Maize_AO-1     | 1014 | SNKWKRGISCVPATYEVNLRPTPG-----KVSIMNDGSI AVEVGGIEIGQGLWTKVKQM    |
| BmIAO1         | 942  | TNRWRKRGLRFSFLRWTP---ISAGITGATVVSINQGDATVTIVHGGVEMGQGINTKAMQI   |
|                |      |                                                                 |
| Silkworm_XDH_1 | 1077 | ATRALGIDV-----SKIHISETSTDKVPNTSATAASAGSDLNMAVLEACEKIMKRL        |
| Fruit_fly_XDH  | 1055 | AARALGIPS-----ELIHISETATDKVPNTSPTAASVGSIDLNGMAVL DACEKLNKRL     |
| Silkworm_XDH_2 | 1056 | ASKALEIGQ-----SRIHISEAATDKIPNSTATAASMSSDLYGMAVLNACNTLNQRL       |
| Human_XDH      | 1050 | ASRALKIPT-----SKIYISETSTNTVPNTSPTAASVSADLNGQAVYAACQTILKRL       |
| Rat_XDH        | 1050 | ASRALKIPT-----SKIHISETSTNTVPNTSPTAASASADLNGQGVY EACQTILKRL      |
| Cow_XDH        | 1050 | ASKALKIPI-----SKIYISETSTNTVPNSSPTAASVSTDIYGVAVY EACQTILKRL      |
| Chicken_XDH    | 1079 | ASRSLGIPT-----SKIYISETSTNTVPNTSPTAASVSADINGMAVHNACQTILKRL       |
| Maize_XDH      | 1088 | AASSFNIPL-----SSVFISETSTDKVPNASPTAASASSDLYGAAVLDACQQIKVRM       |
| Maize_AO-1     | 1069 | TAFGLGQLCPDGGECLLDKVRVIQADTLSLIQGGMTAGSTTSETSCETVRQSCVALVEKL    |
| BmIAO1         | 999  | CAHL LKISMD-----KIQVKATNTIAFTNQFVTGGSVASENVSAAVGAACETLLSRL      |
|                |      |                                                                 |
| Silkworm_XDH_1 | 1129 | KPYIDKNPDGKWENWVSAAYVDR-VLSATGFHATPDIGFDFKTTS-GKPFNYFTYGVAC     |
| Fruit_fly_XDH  | 1107 | APIKEALPGGTWKEWINKAYFDR-VLSATGFYAMPGIGYHPETNPARTYSYTNVGVV       |
| Silkworm_XDH_2 | 1108 | KPYKTKDPNGKWEDWVSEAYVDR-VCLFATGFYSAPKIEYNRNTNS-GRLEFYFTYGVAC    |
| Human_XDH      | 1102 | EPYKKKNPSGSWEDWVTAAYMDT-VLSATGFYRTPNLGYSFETNS-GNPFHYFSYGVAC     |
| Rat_XDH        | 1102 | EPFKKKKPTGPWEAWMDAYTSA-VLSATGFYKTPNLGYSFETNS-GNPFHYFSYGVAC      |
| Cow_XDH        | 1102 | EPFKKKKNPDGSWEDWMAAYQDR-VSLSTGFYRTPNLGYSFETNS-GNAFHYFTYGVAC     |
| Chicken_XDH    | 1131 | EPIKQSNLKGSWEDWIKTAYENC-ISLSATGFYRIPDVGYNFETNK-GKPFHYFSYGVAC    |
| Maize_XDH      | 1140 | EPIASKGTHNSFAELAQACYMER-VDLSAHGFYATPNIGFDWTIGK-GTPFNYFTYGA AF   |
| Maize_AO-1     | 1129 | NPIKES-----LEAKSNTVEW-SALIAQASMASVNLSAQPYWTPDPSPKSYLNYGAGT      |
| BmIAO1         | 1051 | EAVKATMEGSPTFEQVVKQAFDTNVDLKADGLRSASN-----FEPYDVF GATL          |
|                |      |                                                                 |
| Silkworm_XDH_1 | 1187 | TEVEIDCLSGDHQVLRTDIVMDLGEISLNPAIDIGQIEGGFIQGYGLFTIEELIYSPT---   |
| Fruit_fly_XDH  | 1166 | TVVEIDCLTGDHQVLSTDIVMDIGSSLNPAIDIGQIEGAFMQGYGLFTLEELMYS PQ---   |
| Silkworm_XDH_2 | 1166 | SEVIIDCLTGDHEVLRTDIVMDVGESINPAIDIGQIEGAFMQGYGLFTMEEVVFSAN---    |
| Human_XDH      | 1160 | SEVEIDCLTGDHKNLRTDIVMDVGSSLNPAIDIGQVEGAFVQGLGLFTLEELHYSPE---    |
| Rat_XDH        | 1160 | SEVEIDCLTGDHKNLRTDIVMDVGSSLNPAIDIGQVEGAFVQGLGLFTMEELHYSPE---    |
| Cow_XDH        | 1160 | SEVEIDCLTGDHKNLRTDIVMDVGSSLNPAIDIGQVEGAFVQGLGLFTLEELHYSPE---    |
| Chicken_XDH    | 1189 | SEVEIDCLTGDHKNIRTDIVMDVGTSLNPAIDIGQIEGAFVQGI GLFTMEELRYSPE---   |
| Maize_XDH      | 1198 | AEVEIDTLTGDFYTRTADIVMDLGF SINPAIDIGQIEGAFIQGLGWAAIEELKWGDNDNHK  |
| Maize_AO-1     | 1181 | SEVEVDILTGAATILRSDLVYDCGQSLNPAVDLGGQIEGCFVQGI GFFTNE DYKTNSD--- |
| BmIAO1         | 1099 | AEVEIDVLTGEHEILRVDLIEDVGTSVNPEIDIGQIEGAFVMGLGYWTC EQLVYNSTST--- |
|                |      |                                                                 |
| Silkworm_XDH_1 | 1244 | ----GTLYSRGPGAYKIPGFGGYSSEFNVSLLKGAPNPRAVYSSKAVGEPPLFLASSAYF    |
| Fruit_fly_XDH  | 1223 | ----GMLYSRPGMYKLPGFADIPGEFNVSLLTGAPNPRAVYSSKAVGEPPLF IGSSAFF    |
| Silkworm_XDH_2 | 1223 | ----GETLSRGPSTYKIPTLS DIPKEFNVSLLKGAPNPRAVYSSKAIGEPPLFLAASVFF   |
| Human_XDH      | 1217 | ----GSLHTRGPSTYKIPAFGSIPIEFRVSLLRDCPNKKAIYASKAVGEPPLFLAASIFF    |
| Rat_XDH        | 1217 | ----GSLHTRGPSTYKIPAFGSIPIEFRVSLLRDCPNKKAIYASKAVGEPPLFLAASIFF    |
| Cow_XDH        | 1217 | ----GSLHTRGPSTYKIPAFGSIPTEFRVSLLRDCPNKKAIYASKAVGEPPLFLGASVFF    |
| Chicken_XDH    | 1246 | ----GNLYTRGPGMYKIPAFGDIPT EFYVSLLRDCPNSKAIYSSKAVGEPPLFLSASVFF   |
| Maize_XDH      | 1258 | WIRPGHLFTCGPGSYKIPSVNDIPLNFKVSLLKGVNPKAIHSSKAVGEPPLFLGSAVLF     |
| Maize_AO-1     | 1238 | ----GLVIHDGTWYKIPTVDNIPKEFNVEMFNSAPDKKRVLSKASGEPPLVLATSVHC      |
| BmIAO1         | 1157 | ----GQLLTTRAWN YFVPQARDIPQKMNIHLRPKSYSNDTAFGSKCVGEPPLCMSIALVL   |
|                |      |                                                                 |
| Silkworm_XDH_1 | 1300 | AIHEAIIKAARADAG-----VPLEFDMEAPATSARIRMACEDHITKKLKD KPDNSFV PW   |
| Fruit_fly_XDH  | 1279 | AIKEAIIAAREDDQG-----LSGDFPLEAPSTSARIRIACQDKTE LLEIPEPGSFTPW     |
| Silkworm_XDH_2 | 1279 | AIKEAIIAARSDSG-----VPVEFELDAPATCERIRMSCEDDITLQVKPTVKRIGV PW     |



|                |      |                                                                                                                                             |
|----------------|------|---------------------------------------------------------------------------------------------------------------------------------------------|
| Human_XDH      | 1273 | AIKDAIRAARAQHTG----NNV <b>KEL</b> FR <b>LD</b> S <b>PAT</b> PE <b>KIR</b> NACVD <b>KFT</b> TL <b>CV</b> TG <b>VP</b> EN <b>CK</b> PW        |
| Rat_XDH        | 1273 | AIKDAIRAARAQHG-----DNA <b>KQL</b> F <b>QL</b> D <b>S</b> PATPE <b>KIR</b> NACVD <b>QFT</b> TL <b>CV</b> TG <b>VP</b> EN <b>CK</b> SW        |
| Cow_XDH        | 1273 | AIKDAIRAARAQHTN----NNT <b>KEL</b> FR <b>LD</b> S <b>PAT</b> PE <b>KIR</b> NACVD <b>KFT</b> TL <b>CV</b> TG <b>AP</b> GN <b>CK</b> PW        |
| Chicken_XDH    | 1302 | AIKDAI <b>YSARE</b> DSG-----VTE <b>P</b> FR <b>LD</b> S <b>PAT</b> PER <b>IR</b> NACVD <b>TFT</b> K <b>MC</b> PSA <b>EP</b> GT <b>FK</b> PW |
| Maize_XDH      | 1318 | AIKDAISAARA <b>EEG</b> -----HLD <b>WF</b> PLDN <b>PAT</b> PER <b>IR</b> MACVD <b>SI</b> T <b>KK</b> FAGIDYRS <b>KL</b> SV                   |
| Maize_AO-1     | 1294 | AMREAI <b>RAAR</b> K <b>EF</b> SVSTSPAKSAVT <b>FQ</b> MD <b>V</b> PATMP <b>V</b> K <b>EL</b> CGLDVVERYLENVSAASAGP                           |
| BmIAO1         | 1213 | AIIEATAAARK <b>ES</b> GYG-----ATDI <b>FN</b> IGAP <b>F</b> TPE <b>KI</b> SLSTKTAIKE <b>L</b> LYN-----                                       |
|                |      |                                                                                                                                             |
| Silkworm_XDH_1 | 1353 | NV <b>V</b> P-                                                                                                                              |
| Fruit_fly_XDH  | 1332 | N <b>I</b> V <b>P</b> -                                                                                                                     |
| Silkworm_XDH_2 | 1332 | N <b>V</b> I <b>A</b> -                                                                                                                     |
| Human_XDH      | 1329 | S <b>V</b> R <b>V</b> -                                                                                                                     |
| Rat_XDH        | 1328 | S <b>V</b> R <b>I</b> -                                                                                                                     |
| Cow_XDH        | 1329 | S <b>L</b> R <b>V</b> -                                                                                                                     |
| Chicken_XDH    | 1355 | S <b>V</b> R <b>A</b> -                                                                                                                     |
| Maize_XDH      | 1371 | -----                                                                                                                                       |
| Maize_AO-1     | 1354 | NTAKA                                                                                                                                       |
| BmIAO1         |      | -----                                                                                                                                       |

Supplemental Fig. 5. Alignment of the amino acid sequences of several XDHs, a maize AO, and BmIAO1. The 20-amino-acid sequence of BmIAO1 determined here is underlined. Accession numbers are: Silkworm\_XDH\_1 (D38159), Silkworm\_XDH\_2 (D43965), Maize\_XDH (BT069925), Human\_XDH (D11456), Rat\_XDH (J05579), Cow\_XDH (X83508), Chicken\_XDH (D13221), BmIAO1 (XM\_004925903), Fruit\_fly\_XDH (BT015293), and Maize\_AO-1 (D88451).
