# Supplementary material
Source: publisher figshare collection journal article supplement (https://tandf.figshare.com/articles/dataset/_/7171742)
Supplement: Supplementary file 8 [file 1]

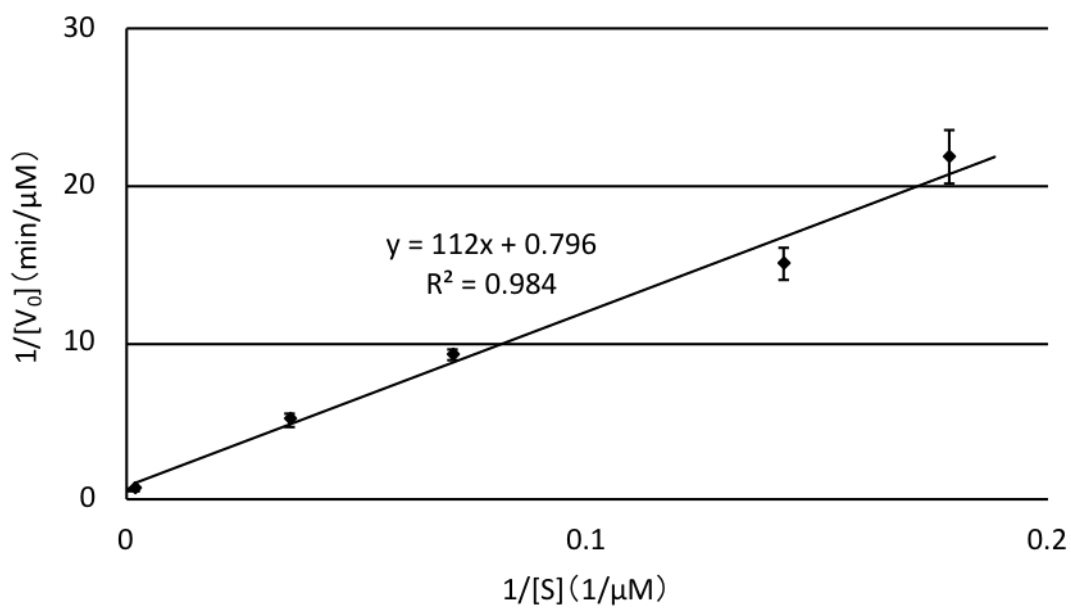

Supplemental Fig. 3. Lineweaver–Burk plot. Lineweaver-Burk plot was constructed by incubation of BmIAO1 with different concentrations of IAAld ranging from 5.6 to 560 mM.
