# Supplementary material
Source: publisher figshare collection journal article supplement (https://tandf.figshare.com/articles/dataset/_/7171742)
Supplement: Supplementary file 9 [file 1]

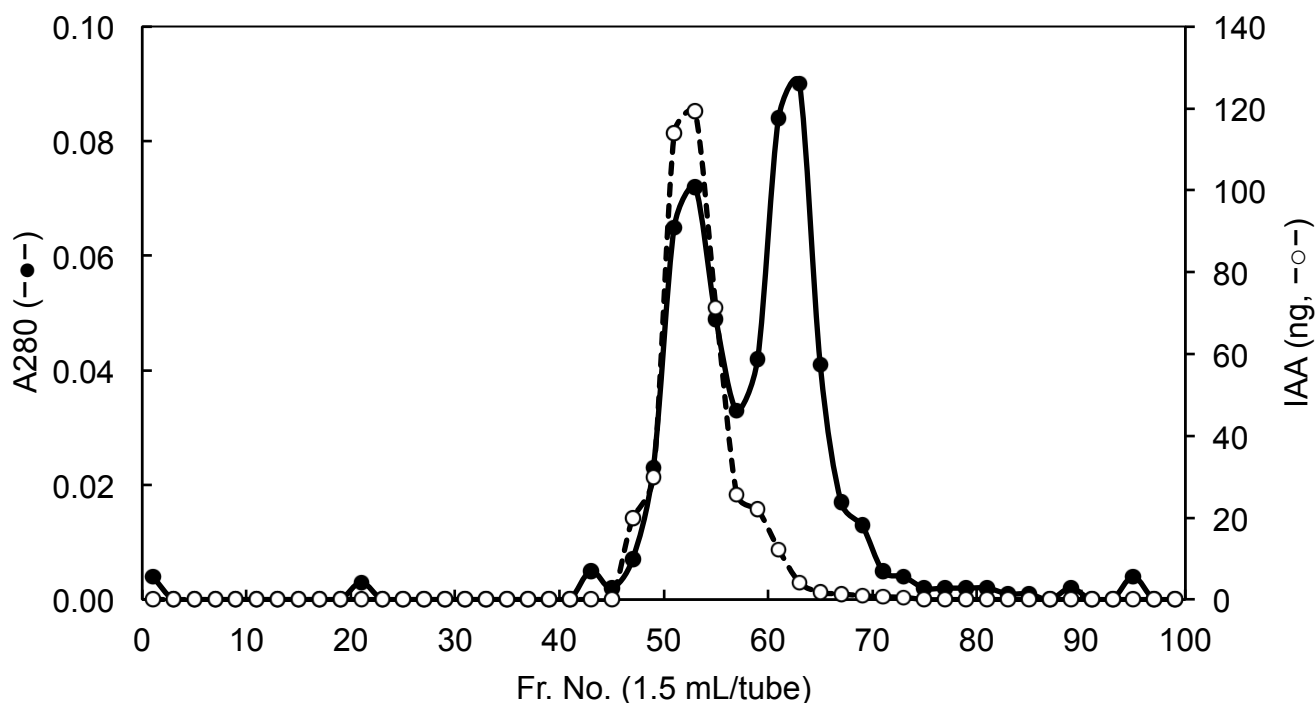

Supplemental Fig. 1. Purification of BmIAO1. The elution profile of proteins detected at 280 nm (closed circles with solid line) and the conversion activity (open circles with dotted line) in each fraction are shown after anion exchange chromatography on a Q-Sepharose Fast Flow column (A), hydrophobic interaction chromatography on a Butyl Cellulofine column (B), and gel filtration chromatography on a Sephacryl S-300 column (C).
